# Supplementary material
Source: Springer Nature journal article supplement (https://www.springermedizin.de/resource/supplementary/12936_2011_1849_MOESM5_ESM.pdf/9541918)

# Aquaporin 4

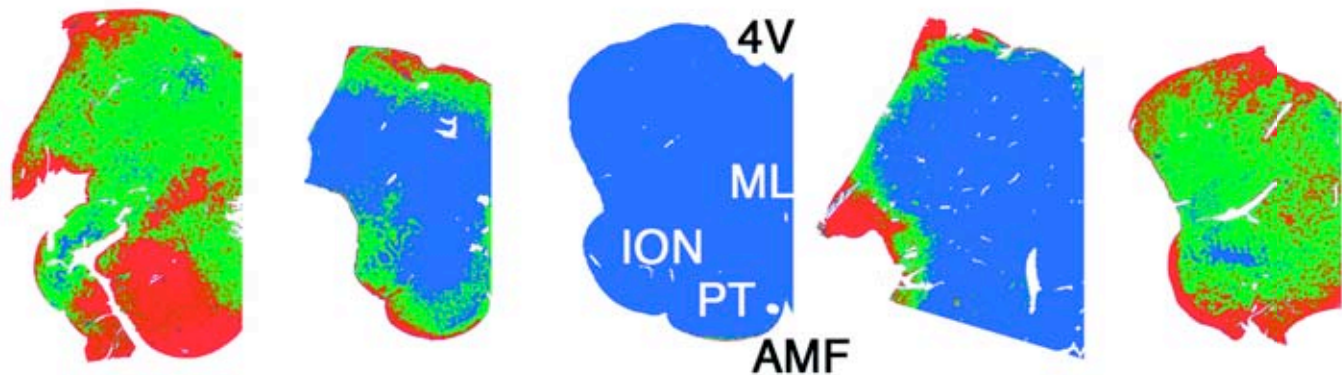

# Glial fibrillary acidic protein

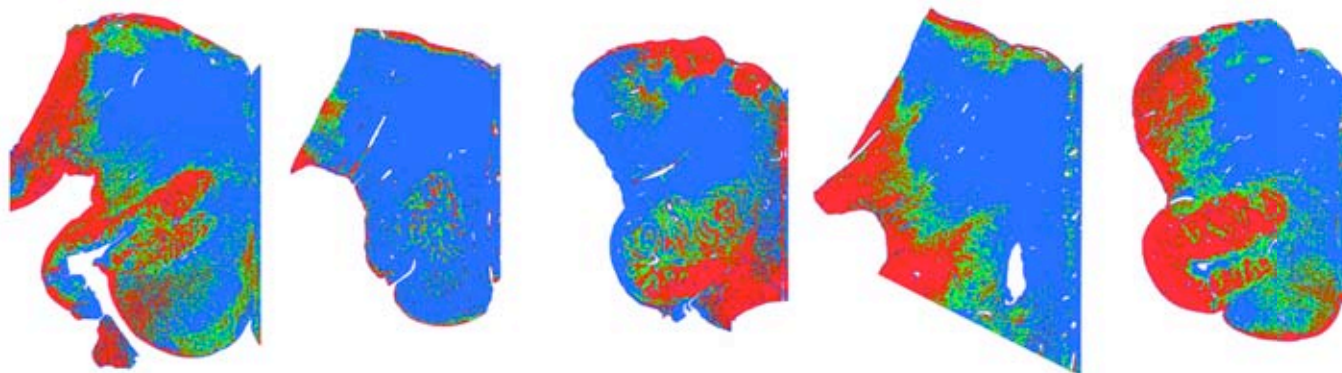

# Fibrinogen

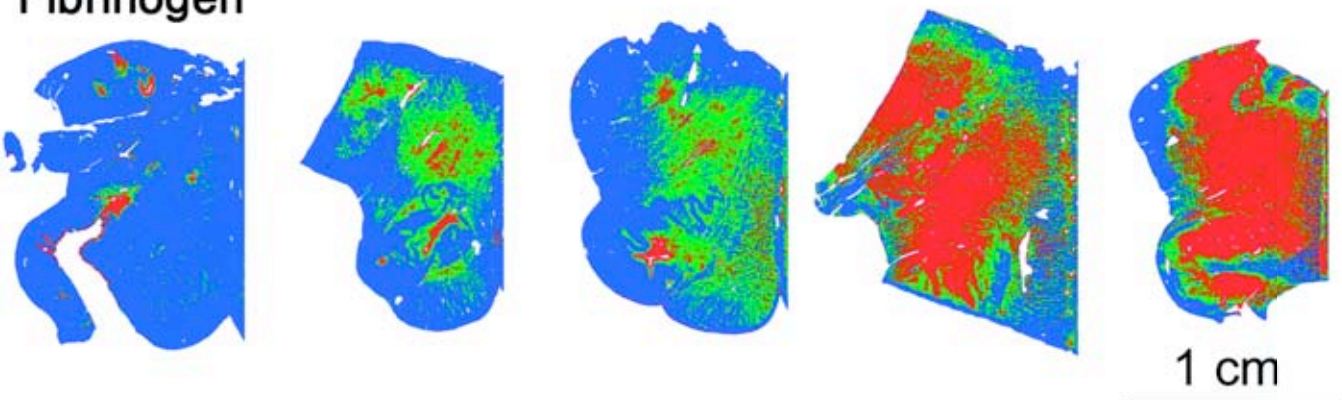

Supplement: MOESM5 [file 9541918]
